# Supplementary material for: Vitamin D Status Is Associated with Modifiable Lifestyle Factors in Pre-Adolescent Children Living in Urban Kuala Lumpur, Malaysia
Source: MDPI journal article supplement (doi:10.3390/nu13072175), 2021-06-24
Supplement: s1 [file s1]

*Supplementary Materials*

# **Vitamin D Status Is Associated with Modifiable Lifestyle Factors in Pre-Adolescent Children Living in Urban Kuala Lumpur, Malaysia**

Winnie Siew Swee Chee <sup>1,\*</sup>, Chung Yuan Chang <sup>1</sup>, Kanimolli Arasu <sup>1</sup>, Soon Yee Wong <sup>1</sup>, Shu Hwa Ong <sup>1</sup>, Wai Yew Yang <sup>1</sup>, Megan Hueh Zan Chong <sup>1</sup>, Meenal Mavinkurve <sup>2</sup>, Erwin Jiayuan Khoo <sup>2</sup>, Karuthan Chinna <sup>3</sup> and Connie M. Weaver <sup>4</sup>

**Table S1.** Associations between 25(OH)D and bone parameters.

|    | Variables   | 25OH(D) | 1       | 2       | 3       | 4       | 5       | 6       | 7     |
|----|-------------|---------|---------|---------|---------|---------|---------|---------|-------|
| 1. | TBBMD       | 0.062   | 1.000   | .       |         |         |         |         |       |
| 2. | TBLHBMD     | −0.002  | 0.943** | 1.000   |         |         |         |         |       |
| 3. | TBBMC       | 0.059   | 0.879** | 0.937** | 1.000   |         |         |         |       |
| 4. | TBLHBMC     | −0.068  | 0.843** | 0.944** | 0.979** | 1.000   |         |         |       |
| 5. | LSBMD       | −0.084  | 0.774** | 0.791** | 0.750** | 0.732** | 1.000   |         |       |
| 6. | LSBMC       | −0.012  | 0.777** | 0.853** | 0.889** | 0.888** | 0.867** | 1.000   |       |
| 7. | BMD Z-score | −0.041  | 0.902** | 0.819** | 0.724** | 0.681** | 0.710** | 0.648** | 1.000 |

Correlation coefficients, \*\* $p = 0.000$ .**Table S2.** Associations between 25OH(D) and variables in the study (Correlation coefficients).

|     | Variables        | 25OH(D) | 1      | 2      | 3      | 4      | 5      | 6     | 7     | 8     | 9     | 10    |
|-----|------------------|---------|--------|--------|--------|--------|--------|-------|-------|-------|-------|-------|
| 1.  | Age              | 0.006   | 1.000  |        |        |        |        |       |       |       |       |       |
| 2.  | Height           | −0.090  | 0.611  | 1.000  |        |        |        |       |       |       |       |       |
| 3.  | Lean Mass        | −0.045  | 0.472  | 0.860  | 1.000  |        |        |       |       |       |       |       |
| 4.  | Fat Mass         | −0.122  | 0.242  | 0.643  | 0.837  | 1.000  |        |       |       |       |       |       |
| 5.  | PAQ.MET          | 0.262   | 0.178  | 0.185  | 0.213  | 0.091  | −0.161 |       |       |       |       |       |
| 6.  | Calcium          | 0.007   | −0.066 | −0.080 | −0.048 | −0.009 | −0.033 | 1.000 |       |       |       |       |
| 7.  | Vit D            | 0.211   | −0.052 | −0.177 | −0.154 | −0.115 | −0.205 | 0.266 | 1.000 |       |       |       |
| 8.  | Hours of sun exp | 0.173   | 0.076  | 0.127  | 0.138  | 0.044  | −0.084 | 0.054 | 0.190 | 1.000 |       |       |
| 9.  | BSA              | 0.338   | 0.138  | 0.106  | 0.125  | 0.072  | −0.165 | 0.041 | 0.166 | 0.171 | 1.000 |       |
| 10. | Sun Index        | 0.351   | 0.110  | 0.149  | 0.167  | 0.057  | −0.151 | 0.042 | 0.213 | 0.743 | 0.573 | 1.000 |

Among the tested variables,  $p$ -values for all variables, except for Age and Calcium were  $< 0.25$ .The association between Lean Mass and Fat Mass was high ( $r = 0.837$ ), indication a possible multicollinearity. In the analysis only Fat Mass was included.

**Table S3.** Associations between 25OH(D) and variables in the study (*p*-values).

|     | Variables        | 25OH(D) | 1     | 2     | 3     | 4     | 5     | 6     | 7     | 8     | 9     | 10 |
|-----|------------------|---------|-------|-------|-------|-------|-------|-------|-------|-------|-------|----|
| 1.  | Age              | 0.464   | .     |       |       |       |       |       |       |       |       |    |
| 2.  | Height           | 0.081   | 0.000 | .     |       |       |       |       |       |       |       |    |
| 3.  | Lean Mass        | 0.243   | 0.000 | 0.000 | .     |       |       |       |       |       |       |    |
| 4.  | Fat Mass         | 0.029   | 0.000 | 0.000 | 0.000 | .     |       |       |       |       |       |    |
| 5.  | PAQ.MET          | 0.000   | 0.003 | 0.002 | 0.000 | 0.079 | 0.006 |       |       |       |       |    |
| 6.  | Calcium          | 0.458   | 0.153 | 0.108 | 0.228 | 0.443 | 0.303 | .     |       |       |       |    |
| 7.  | Vit D            | 0.000   | 0.209 | 0.003 | 0.008 | 0.037 | 0.001 | 0.000 | .     |       |       |    |
| 8.  | Hours of sun exp | 0.004   | 0.121 | 0.024 | 0.016 | 0.250 | 0.095 | 0.201 | 0.001 | .     |       |    |
| 9.  | BSA              | 0.000   | 0.016 | 0.050 | 0.026 | 0.132 | 0.005 | 0.262 | 0.005 | 0.004 | .     |    |
| 10. | Sun Index        | 0.000   | 0.044 | 0.010 | 0.005 | 0.189 | 0.009 | 0.258 | 0.000 | 0.000 | 0.000 | .  |

Among the tested variables, *p*-values for all variables, except for Age and Calcium were < 0.25.

The association between Lean Mass and Fat Mass was high ( $r = 0.837$ ), indication a possible multicollinearity. In the analysis only Fat Mass was included.
